# Supplementary material
Source: publisher site journal article supplement (https://www.dovepress.com/article/supplementary_file/617362/617362%20Supplementary%20Material.docx)
Supplement: Supplementary file 1 [file 617362%20Supplementary%20Material.docx]

**Table S1. Pathogen species isolated by conventional culture from brain abscess patients.**

| **Classification** | **Pathogen (genus)** | **Isolate (%)** | **Pathogen (species)** | **Isolate** |
| --- | --- | --- | --- | --- |
| **Gram-positive** |  |  |  |  |
|  | *Streptococcus* spp. | 14 (38.9) | *Streptococcus intermedius* | 7 |
|  |  | *Streptococcus constellatus* | 3 |
|  |  | *Streptococcus anginosus* | 1 |
|  |  | *Streptococcus sanguinis* | 2 |
|  |  | *Streptococcus mitis* | 1 |
| *Staphylococcus* spp. | 4 (11.1) | *Staphylococcus epidermidis* | 2 |
|  |  | *Staphylococcus capitis* | 1 |
|  |  | *Staphylococcus hominis* | 1 |
| *Micromonas* spp. | 1 (2.8) | *Micromonas pusilla* | 1 |
| *Nocardia* spp. | 1 (2.8) | *Nocardia farcinica* | 1 |
| *Bacillus* spp. | 1 (2.8) | *Bacillus cereus* | 1 |
| **Gram-negative** |  |  |  |  |
|  | *Fusobacterium* spp. | 3 (8.3) | *Fusobacterium nucleatum* | 3 |
|  | *Aggregatibacter* spp. | 3 (8.3) | *Aggregatibacter aphrophilus* | 3 |
|  | *Klebsiella* spp. | 2 (5.6) | *Klebsiella pneumoniae* | 2 |
|  | *Porphyromonas* spp. | 1 (2.8) | *Porphyromonas gingivalis* | 1 |
|  | *Acinetobacter* spp. | 1 (2.8) | *Acinetobacter baumannii* | 1 |
|  | *Bacteroides* spp. | 1 (2.8) | *Bacteroides pyogenes* | 1 |
|  | *Burkholderia* spp. | 1 (2.8) | *Burkholderia mallei* | 1 |
| **Fungus** |  |  |  |  |
|  | *Cryptococcus* spp. | 1 (2.8) | *Cryptococcus neoformans* | 1 |
| *Sporothrix* spp. | 1 (2.8) | *Sporothrix schenckii* | 1 |
| **Acid-fast bacilli** |  |  |  |  |
|  | *Mycobacterium* spp. | 1 (2.8) | *Mycobacterium tuberculosis* | 1 |
|  |  |  |  |  |
| **Total** |  | 36 (100) |  |  |
|  | Bacteria | 33 (91.7) |  |  |
|  | Fungi | 2 (5.6) |  |  |
|  | Acid-fast bacilli | 1 (2.8) |  |  |

**Table S2. Pathogen species isolated by mNGS from brain abscess patients.**

| **Classification** | **Pathogen (genus)** | **Isolate(%)** | **Pathogen (species)** | **Isolate** |
| --- | --- | --- | --- | --- |
| **Gram-positive** |  |  |  |  |
|  | *Streptococcus* spp. | 28 (20.9) | *Streptococcus intermedius* | 16 |
|  |  | *Streptococcus constellatus* | 7 |
|  |  | *Streptococcus anginosus* | 2 |
|  |  | *Streptococcus pneumoniae* | 1 |
|  |  | *Streptococcus oralis* | 1 |
|  |  | *Streptococcus agalactiae* | 1 |
| *Parvimonas* spp. | 9 (6.7) | *Parvimonas micra* | 9 |
| *Actinomyces* spp. | 5 (3.7) | *Actinomyces odontolyticus* | 5 |
| *Staphylococcus* spp. | 3 (2.2) | *Staphylococcus capitis* | 1 |
|  |  | *Staphylococcus aureus* | 1 |
|  |  | *Staphylococcus saccharolyticus* | 1 |
| *Nocardia* spp. | 3 (2.2) | *Nocardia farcinica* | 3 |
| *Corynebacterium* spp. | 2 (1.5) | *Corynebacterium striatum* | 1 |
|  |  | *Multidrug-resistant Corynebacterium* | 1 |
| *Propionibacterium* spp. | 1 (0.7) | *Cutibacterium acnes* | 1 |
|  | *Enterococcus* spp. | 1 (0.7) | *Enterococcus faecium* | 1 |
| **Gram-negative** |  |  |  |  |
|  | *Fusobacterium* spp. | 18 (13.4) | *Fusobacterium nucleatum* | 18 |
|  | *Porphyromonas* spp. | 11 (8.2) | *Porphyromonas gingivalis* | 11 |
|  | *Campylobacter* spp. | 9 (6.7) | *Campylobacter rectus* | 9 |
|  | *Prevotella* spp. | 7 (5.2) | *Prevotella loescheii* | 3 |
|  |  |  | *Prevotella intermedia* | 2 |
|  |  |  | *Prevotella oralis* | 1 |
|  |  |  | *Prevotella melaninogenica* | 1 |
|  | *Tannerella* spp. | 6 (4.4) | *Tannerella forsythia* | 6 |
|  | *Klebsiella* spp. | 6 (4.4) | *Klebsiella pneumoniae* | 6 |
|  | *Bacteroides* spp. | 4 (3) | *Bacteroides pyogenes* | 3 |
|  |  |  | *Bacteroides heparinolyticus* | 1 |
|  | *Aggregatibacter* spp. | 4 (3) | *Aggregatibacter aphrophilus* | 4 |
|  | *Treponema* spp. | 2 (1.5) | *Treponema denticola* | 2 |
|  | *Escherichia* spp. | 2 (1.5) | *Escherichia coli* | 1 |
|  |  |  | *Escherichia albertii* | 1 |
|  | *Shigella* spp. | 2 (1.5) | *Shigella boydii* | 1 |
|  |  |  | *Shigella dysenteriae* | 1 |
|  | *Veillonella* spp. | 1 (0.7) | *Veillonella parvula* | 1 |
|  | *Moraxella* spp. | 1 (0.7) | *Moraxella catarrhalis* | 1 |
|  | *Olsenella* spp. | 1 (0.7) | *Olsenella uli* | 1 |
|  | *Eikenella* spp. | 1 (0.7) | *Eikenella* | 1 |
|  | *Neisseria* spp. | 1 (0.7) | *Neisseria* | 1 |
|  | *Brucella* spp. | 1 (0.7) | *Brucella melitensis* | 1 |
| **Mycoplasma** |  |  |  |  |
|  | *Mycoplasma* spp. | 1 (0.7) | *Ureaplasma urealyticum* | 1 |
| **Fungi** |  |  |  |  |
|  | *Cryptococcus* spp. | 2 (1.5) | *Cryptococcus neoformans* | 2 |
| **Virus** |  |  |  |  |
|  | *Anellovirus* spp. | 1 (0.7) | Torque teno virus | 1 |
|  | *Herpesvirus* spp. | 1 (0.7) | Human Herpesvirus 5 | 1 |
|  |  |  |  |  |
| **Total** |  | 134 (100) |  |  |
|  | Bacteria | 129 (96.3) |  |  |
|  | Mycoplasma | 1 (0.7) |  |  |
|  | Fungi | 2 (1.5) |  |  |
|  | Virus | 2 (1.5) |  |  |
